# Supplementary material for: Sepsis-Induced Coagulopathy Phenotype Induced by Oxidized High-Density Lipoprotein Associated with Increased Mortality in Septic-Shock Patients
Source: MDPI journal article supplement (doi:10.3390/antiox12030543), 2023-02-21

# SUPPLEMENTAL INFORMATION

## **Sepsis-induced coagulopathy phenotype induced by oxidized high-density lipoprotein associated with increased mortality in septic-shock patients.**

Yolanda Prado<sup>1,2</sup>, Pablo Tapia<sup>3</sup>, Felipe Eltit<sup>4,5</sup>, Cristian Reyes-Martínez<sup>6</sup>, Carmen G. Feijóo<sup>6</sup>,  
Felipe Marchant<sup>1,2</sup>, Claudia A. Riedel<sup>2,7</sup>, Claudio Cabello-Verrugio<sup>2,8,9</sup>,  
Jimmy Stehberg<sup>10,\*</sup> and Felipe Simon<sup>1,2,11,\*</sup>

<sup>1</sup>Laboratory of Integrative Physiopathology, Faculty of Life Sciences, Universidad Andres Bello, Santiago, Chile.

<sup>2</sup>Millennium Institute on Immunology and Immunotherapy, Santiago, Chile.

<sup>3</sup>Unidad de Paciente Crítico Adulto, Hospital Clínico La Florida, La Florida, Santiago, Chile.

<sup>4</sup>Department of Urologic Sciences, University of British Columbia, Vancouver, Canada.

<sup>5</sup>Vancouver Prostate Centre, Vancouver, Canada.

<sup>6</sup>Fish Immunology Laboratory, Faculty of Life Science, Universidad Andres Bello, Santiago, Chile.

<sup>7</sup>Laboratory of Endocrinology-Immunology, Faculty of Life Sciences, Universidad Andres Bello, Santiago, Chile.

<sup>8</sup>Laboratory of Muscle Pathology, Fragility and Aging, Faculty of Life Sciences, Universidad Andres Bello, Santiago, Chile.

<sup>9</sup>Center for the Development of Nanoscience and Nanotechnology (CEDENNA), Universidad de Santiago de Chile, Santiago, Chile.

<sup>10</sup>Laboratory of Neurobiology, Institute of Biomedical Sciences, Faculty of Medicine and Faculty of Life Science, Universidad Andres Bello, Santiago, Chile.

<sup>11</sup>Millennium Nucleus of Ion Channel-Associated Diseases (MiNICAD), Santiago, Chile.

## **SUPPLEMENTAL MATERIAL AND METHODS**

### **Determination of coagulation and blood flow changes induced by oxHDL in zebrafish**

Adult zebrafish were maintained at the fish facility of the Universidad Andres Bello, following standard protocols. Wild type AB and Tg(fli1:eGFP)<sup>y1</sup> embryos were obtained by natural spawning and maintained at 28°C in E3 medium (5 mM NaCl, 0.17 mM KCl, 0.33 mM CaCl<sub>2</sub>, 0.33 mM MgSO<sub>4</sub>, pH 7.0). Larval ages are expressed in days post fertilization (dpf). Handling procedures were approved by the Commission of Bioethics and Biosafety of Universidad Andres Bello (N° 004/2021). Before microinjection, wild type and Tg(fli1:eGFP)<sup>y1</sup> 4 dpf larvae were anesthetized with 0.03% tricaine (Sigma, USA) and mounted in 1 % low melting agarose (Sigma, USA). Using a microneedle attached to an air-driven Cell Tram (NARISHIGE, Japan), larvae were non-injected or individually microinjected in the heart with 8 nL containing saline buffer, 75 ng HDL, 75 ng oxHDL and maintained at 28°C for 24 h in E3 medium. Non-treated larvae were used to confirm that the vehicle did not have adverse effects. To determine the existence of coagulation, wild type larvae were stained with o-dianisidine (0.6 mg/ml, 0.01 M sodium acetate, pH 5.2, 0.65% H<sub>2</sub>O<sub>2</sub>, and 40% ethanol) for 30 min at RT, washed with distilled water and fixed in 4% PFA at 4°C ON. Then, larvae were imaged with a Leica MZ12.5 stereomicroscopes and images were processed using ImageJ software and BioVoxxel plugin to quantify the total pixel intensity (IU) in a defined region of interest (ROI). To determine changes in blood flow, time-lapse assay were performed on 5 dpf Tg(fli1:eGFP)<sup>y1</sup>

larvae using a Leica TCS Sp8 confocal microscope acquired images every 2 seconds for 60 seconds in the segment of the caudal vein above the midgut. Images were processed using ImageJ software.

## SUPPLEMENTAL TABLE LEGEND

**Supplemental Table S1. Demographic characteristics and clinical data of ICU SSP and NSSP, and healthy volunteers.**

## SUPPLEMENTAL FIGURE LEGEND

**Supplemental Figure S1. Plasma level of aPPT and correlation with oxHDL and INDEX in SSP.** Plasma level of aPPT (A). Statistical differences were assessed by student's t-test (Mann-Whitney) for SSP and NSSP. \* $p < 0.05$ . Correlation analyses between: aPPT with high-oxHDL (B, upper-left panel,  $r = -0.52$ ;  $p = \text{NS}$ ), low-oxHDL (B, lower-left panel,  $r = -0.8695$ ;  $p = 0.0005$ ), high-INDEX (B, upper-right panel,  $r = 0.5094$ ;  $p = \text{NS}$ ) and low-INDEX (B, lower-right panel,  $r = -0.1357$ ;  $p = \text{NS}$ ).

**Supplemental Figure S2. Administration of oxHDL induces coagulation in zebrafish vasculature.** *Zebrafish larvae* were subjected to o-dianisidine staining to evaluate *in vivo* coagulation. Control (non-injected) or injected with saline solution (10 nL NaCl 0.09%), oxHDL (10 nL oxHDL 4  $\mu\text{g}/\mu\text{L}$ ) and HDL (10 nL HDL 4  $\mu\text{g}/\mu\text{L}$ ) for 24 h (A). Thrombus formation was analyzed 24 h post injection in the caudal vein by o-dianisidine staining. (B-E) Representative images of zebrafish larvae non-injected (B) or injected with saline solution (C), oxHDL (D) and HDL (E). Doted red box depicts o-dianisidine staining. (F) Quantification of o-dianisidine staining in caudal vein of *Zebrafish larvae* in control non-injected condition (dark grey circles) or injected with saline solution (grey circles), oxHDL (orange circles) and HDL (green circles). Results of the total pixel intensity (I.U.) in a defined region of interest (ROI), were normalized with the median value of control condition. *Tg(fli1:eGFP)<sup>y1</sup> larvae*, having the vasculature and thrombocytes fluorescently green labeled, were subjected to time lapse analysis to evaluate blood flow *in vivo* coagulation. Blood flow time lapse analysis was determined as the number of platelets observed in 60 seconds in a section of the caudal vein (doted red box) were performed by time lapse analysis, in non-injected or injected with saline solution, oxHDL, and HDL (G). (H-K). Representative images of *Tg(fli1:eGFP)<sup>y1</sup> larvae* non-injected (H) or injected with saline solution (I), oxHDL (J) and HDL (K). (L) Quantification of blood flow time lapse analysis in a section of the caudal vein of *Tg(fli1:eGFP)<sup>y1</sup> larvae* in control non-injected condition (dark grey circles) or injected with saline solution (grey circles), oxHDL (orange circles) and HDL (green circles). Statistical differences were assessed by a one-way analysis of variance (ANOVA) (Kruskal–Wallis) followed by Dunn's *post hoc* test. \*\*\* $p < 0.001$ . Values are expressed as the median  $\pm$  10-90 percentile.

**Supplemental Figure S3. Plasma level of coagulation factors and soluble platelet adhesion proteins correlates with ISTH-DIC score in SSP.** Correlation analyses between: TP with ISTH-DIC score from high-oxHDL (A, upper panel  $r = 0.7276$ ;  $p = 0.0048$ ), and from high-INDEX (A, lower panel,  $r = 0.801$ ;  $p = 0.0018$ ), TAFI with ISTH-DIC score from high-oxHDL (B, upper panel,  $r = 0.411$ ;  $p = 0.16$ ), and from high-INDEX (B, lower panel,  $r = 0.716$ ;  $p = 0.008$ ), t-PA with ISTH-DIC score from high-oxHDL (C, upper panel,  $r = -0.2624$ ;  $p = 0.3865$ ), and from high-INDEX (C, lower panel,  $r = -0.6086$ ;  $p = 0.0357$ ), TFPI with ISTH-DIC score from high-oxHDL (D, upper panel,  $r = -0.645$ ;  $p = 0.017$ ), and from high-INDEX (D, lower panel,  $r = -0.541$ ;  $p = 0.048$ ), svWF with ISTH-DIC score from high-oxHDL (E, upper panel,  $r = 0.6186$ ;  $p = 0.0242$ ), and from high-INDEX (E, lower panel,  $r = 0.779$ ;  $p = 0.002$ ), sP-Sel with ISTH-DIC score from high-oxHDL (F, upper panel,  $r = 0.5797$ ;  $p = 0.038$ ), and from high-INDEX (F, lower panel,  $r = 0.709$ ;  $p = 0.01$ ).

**Supplemental Figure S4. Coagulation factors and soluble platelet adhesion proteins expression in CMEC form SSP.** CMEC were magnetic bead-based immunoseparated from HV, high-oxHDL and low-oxHDL SSP blood samples and protein expression analyses by flow cytometry were performed.

**Supplemental Figure S5. Coagulation factors and soluble platelet adhesion proteins expression in CMEC correlates with ISTH-DIC score in SSP.** Correlation analyses between: TP with ISTH-DIC score from high-oxHDL (A, middle-left panel,  $r = 0.5399$ ;  $p = 0.047$ ) and from high-INDEX (A, right panel,  $r = 0.647$ ;  $p = 0.023$ ), TAFI with ISTH-DIC score from high-oxHDL (B, middle-left panel,  $r = 0.2989$ ;  $p = 0.03212$ ) and from high-INDEX (B, right panel,  $r = 0.607$ ;  $p = 0.036$ ), t-PA with ISTH-DIC score from high-oxHDL (C, middle-left panel,  $r = -0.359$ ;  $p = 0.228$ ) and from high-INDEX (C, right panel,  $r = -0.565$ ;  $p = 0.0445$ ), TFPI with ISTH-DIC score from high-oxHDL (D, middle-left panel,  $r = -0.333$ ;  $p = 0.267$ ) and from high-INDEX (D, right panel,  $r = -0.519$ ;  $p = 0.044$ ), vWF with ISTH-DIC score from high-oxHDL (E, middle-left panel,  $r = 0.554$ ;  $p = 0.049$ ) and from high-INDEX (E, right panel,  $r = 0.7176$ ;  $p = 0.009$ ), P-Sel with ISTH-DIC score from high-oxHDL (F, middle-left panel,  $r = 0.338$ ;  $p = 0.259$ ) and from high-INDEX (F, right panel,  $r = 0.6946$ ;  $p = 0.0122$ ).

**Supplemental Figure S6. Coagulation factors and platelet adhesion proteins expression in cultured EC exposed to plasma from SSP.** Plasma samples were collected from HV, high-oxHDL and low-oxHDL SSP blood samples and then added to cultured EC for 24 h.

**Supplemental Figure S7. Coagulation factors and platelet adhesion proteins expression in cultured EC exposed to plasma from SSP correlates with ISTH-DIC score in SSP.** Correlation analyses between: TP with ISTH-DIC score from high-oxHDL (A, middle-left panel,  $r = 0.3929$ ;  $p = 0.1841$ ) and from high-INDEX (A, right panel,  $r = 0.665$ ;  $p = 0.018$ ), TAFI with ISTH-DIC score from high-oxHDL (B, middle-left panel,  $r = 0.2989$ ;  $p = 0.3212$ ) and from high-INDEX (B, right panel,  $r = 0.607$ ;  $p = 0.036$ ), t-PA with ISTH-DIC score from high-oxHDL (C, middle-left panel,  $r = -0.4951$ ;  $p = 0.085$ ) and from high-INDEX (C, right panel,  $r = -0.672$ ;  $p = 0.017$ ), TFPI with ISTH-DIC score from high-oxHDL (D, middle-left panel,  $r = -0.641$ ;  $p = 0.018$ ) and from high-INDEX (D, right panel,  $r = -0.575$ ;  $p = 0.041$ ), vWF with ISTH-DIC score from high-oxHDL (E, middle-left panel,  $r = 0.2581$ ;  $p = 0.3946$ ) and from high-INDEX (E, right panel,  $r = 0.6049$ ;  $p = 0.0372$ ), P-Sel with ISTH-DIC score from high-oxHDL (F, middle-left panel,  $r = 0.516$ ;  $p = 0.0411$ ) and from high-INDEX (F, right panel,  $r = 0.7371$ ;  $p = 0.0062$ ).

**Supplemental Figure S8. Coagulation factors and platelet adhesion proteins mRNA expression in cultured EC exposed to exogenous SSP plasma preparation.**

## SUPPLEMENTAL MOVIE LEGENDS

**Supplemental Movie S1.** Representative time lapse in control non-injected condition. Representative time lapse of Tg(fli1:eGFP)<sup>y1</sup> 4 dpf larvae non-microinjected in the heart with 8 nL of saline buffer (NaCl 0,9%)

**Supplemental Movie S2.** Representative time lapse in saline-injected condition. Representative time lapse of Tg(fli1:eGFP)<sup>y1</sup> 4 dpf larvae microinjected in the heart with 8 nL of saline buffer (NaCl 0,9%)

**Supplemental Movie S3.** Representative time lapse in oxHDL-injected condition. Representative time lapse of Tg(fli1:eGFP)<sup>y1</sup> 4 dpf larvae microinjected in the heart with 8 nL of oxHDL (75 ng).

**Supplemental Movie S4.** Representative time lapse in HDL-injected condition. Representative time lapse of Tg(fli1:eGFP)<sup>y1</sup> 4 dpf larvae microinjected in the heart with 8 nL of oxHDL (75 ng).

# Supplemental Table S1

**Supplemental Table S1.**

**Demographic characteristics and clinical data of UCI SSP and NSSP, and healthy volunteers**

| Variable                                 | Healthy<br>Volunteers<br>(n=39) | UCI<br>SSP<br>(n=26) | UCI<br>NSSP<br>(n=16) |
|------------------------------------------|---------------------------------|----------------------|-----------------------|
| Mortality at 30 days, %                  | 0                               | 46,2                 | 50                    |
| APACHE II, median (IQR)                  | ND                              | 23.5 (20.5-25)       | 25 (23-27)            |
| SOFA, median (IQR)                       | ND                              | 12 (9-13)            | 10 (9-13)             |
| Age (ys), median (IQR)                   | 60 (42-70)                      | 64 (53-76)           | 65 (55-73.5)          |
| BMI, median (IQR)                        | 24.8 (22.9-29.5)                | 26.1 (23.8-30.2)     | 27.4 (25.3-28.7)      |
| Male sex, (% of male)                    | 54                              | 54                   | 75                    |
| Time of sampling (h)*, median (IQR)      | NA                              | 55 (50-72)           | 61 (49-70)            |
| CRP (mg/dl), median (IQR)                | ND                              | 30,4 ( 24.8-32.4)    | 25.4 ( 19.2-27.8)     |
| Resuscitation Fluid (Liter),median (IQR) | NA                              | 6.1 (5.4 -7.4)       | 6.0 (5.2-7.6)         |
| Blood lactate level (mmol/L)median (IQR) | ND                              | 9.1 (7.2-13.9)       | 8.7 (6.6-13.5)        |
| Norepinephrine (ug/kg/min) median (IQR)  | NA                              | 0.31 (0.22-0.59)     | 0.24 (0.18-0.57)      |
| Renal replacement therapy*(%)            | 0                               | 28,2                 | 25                    |
| Corticosteroids, %                       | NA                              | 81                   | 69                    |
| Mechanical ventilation, %                | 0                               | 100                  | 100                   |

**Definition of abbreviations:**

BMI, body mass index; CRP, C-reactive protein; APACHE-II,

Acute Physiology and Chronic Health Evaluation II score; SOFA, Sepsis-related Organ Failure Assessment,

IQR: interquartile range (expressed as percentile 25th, percentile 75th), ND: non-determined, NA\_ non-applicable

\* The sample for analysis was collected always prior to connection to a renal replacement therapy.

Supplemental Figure S1

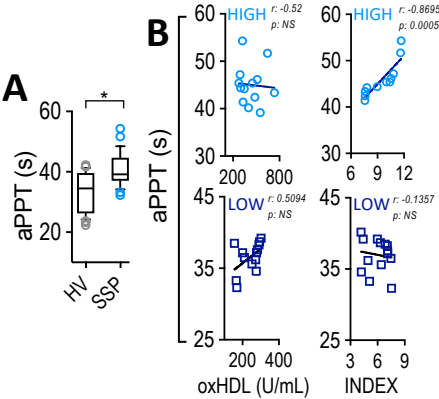

# Supplemental Figure S2

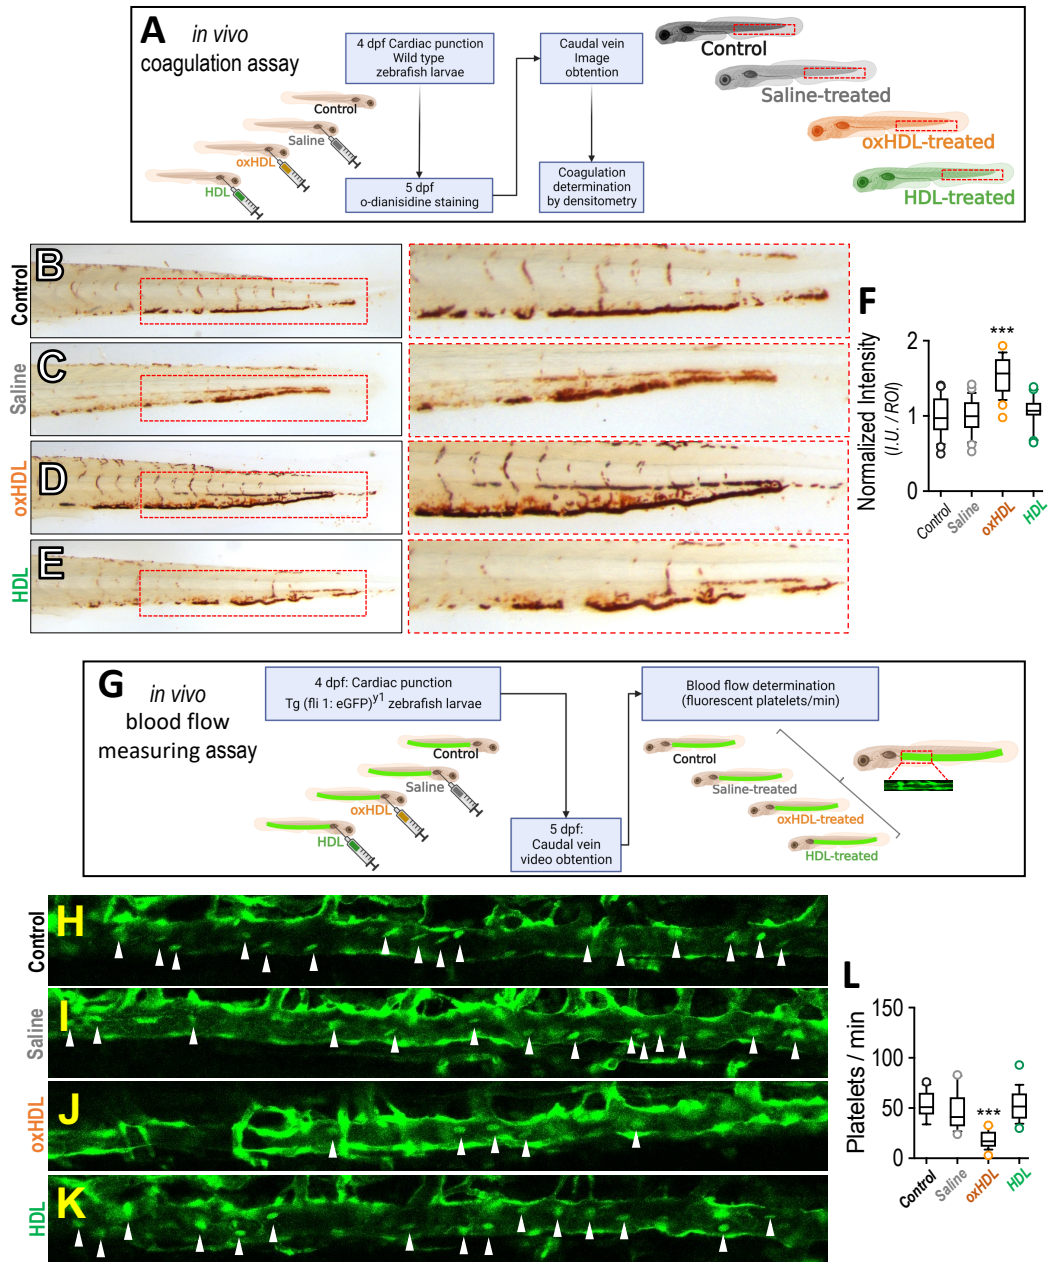

Supplemental Figure S3

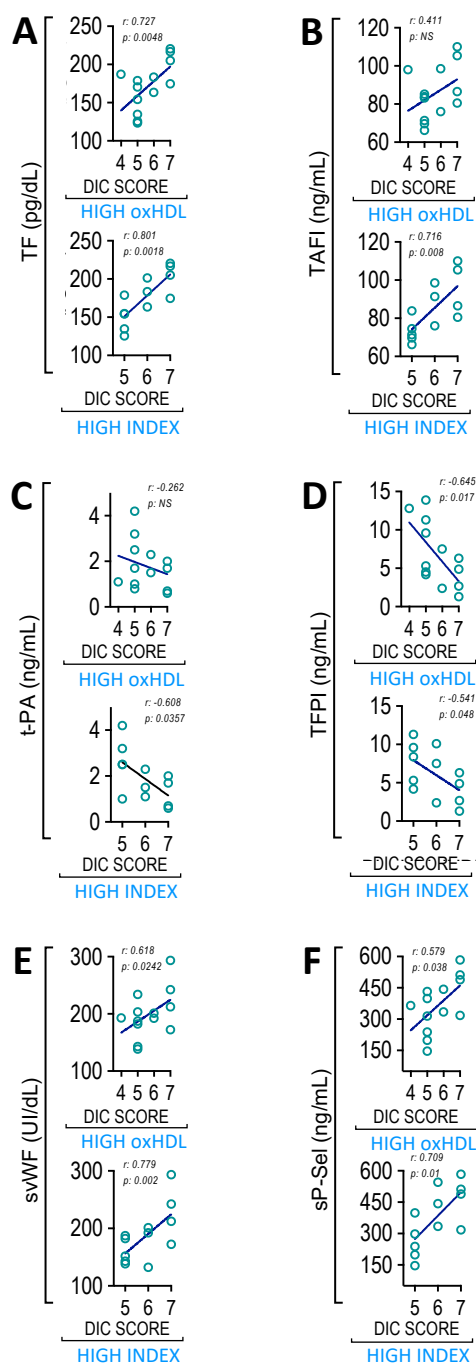

Supplemental Figure S4

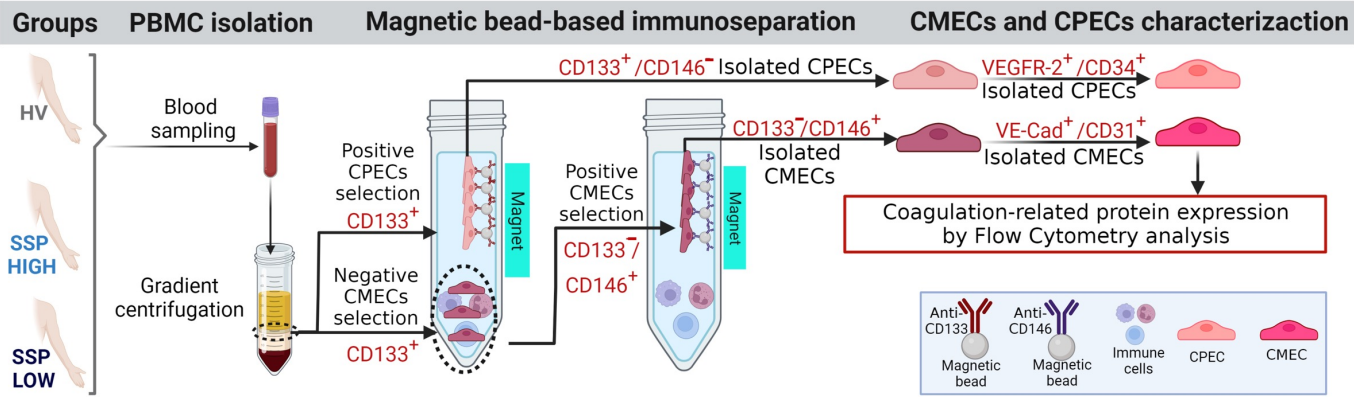



Supplemental Figure S5

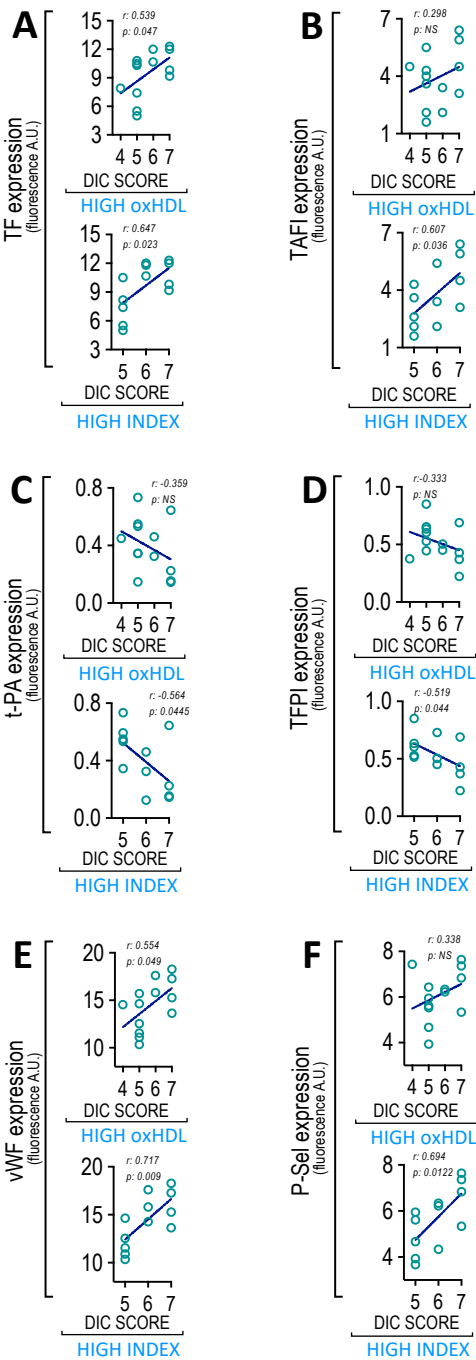

Supplemental Figure S6

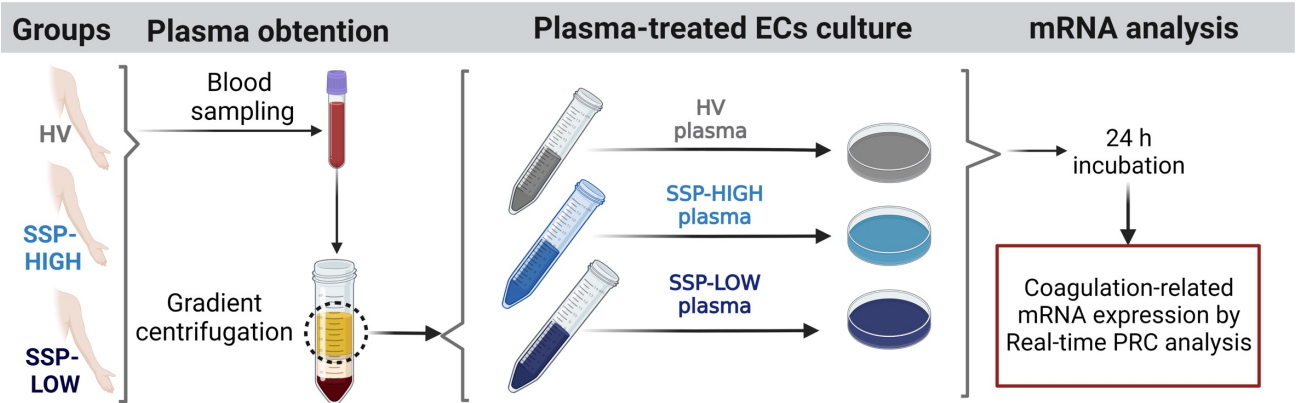

Supplemental Figure S7

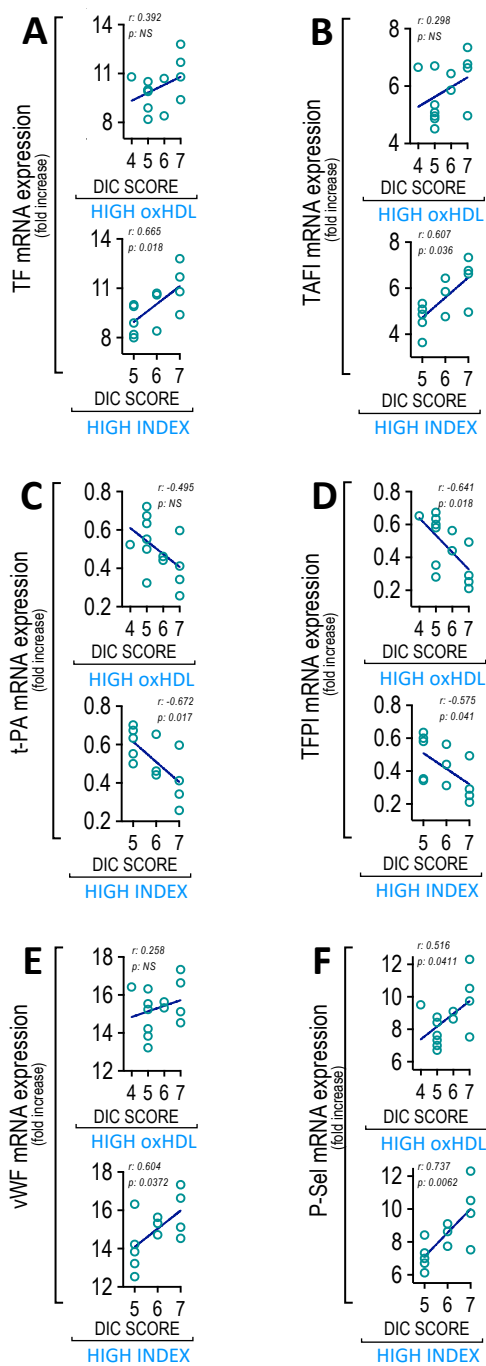

Supplemental Figure S8

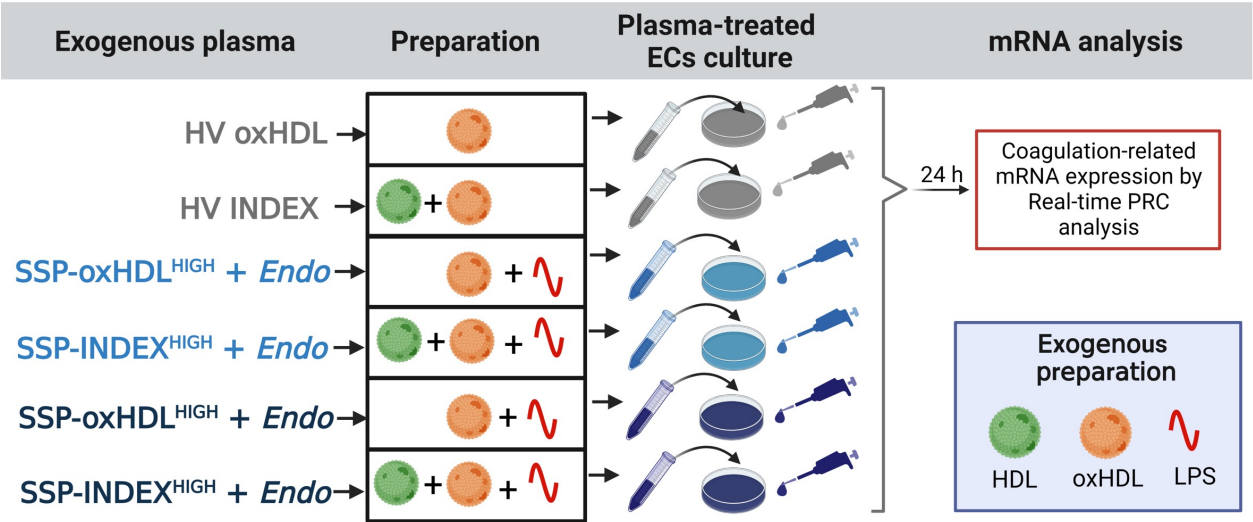

Supplement: s1 [file s1]
